1 Recurrent emergence and transmission of a SARS-CoV-2 Spike deletion  $\Delta$ H69/ $\Delta$ V70

2

3 Kemp SA<sup>1</sup>, Datir RP<sup>1</sup>, Collier DA<sup>1</sup>, Ferreira IATM<sup>2,3</sup>, Carabelli A<sup>3</sup>, Harvey W<sup>5</sup>, Robertson DL<sup>4</sup>,

4 Gupta RK<sup>2,3</sup>

5

6 <sup>1</sup>Division of Infection and Immunity, University College London, London, UK.

7 <sup>2</sup>Cambridge Institute of Therapeutic Immunology & Infectious Disease (CITIID), Cambridge,

8 UK.

9 <sup>3</sup>Department of Medicine, University of Cambridge, Cambridge, UK.

10 <sup>4</sup>MRC - University of Glasgow Centre for Virus Research, Glasgow, UK.

11 <sup>5</sup>Institute of Biodiversity, Animal Health and Comparative Medicine, University of Glasgow,

12 Glasgow, UK

13

14

15 Address for correspondence:

16 Ravindra K. Gupta

17 Cambridge Institute for Therapeutic Immunology and Infectious Diseases

18 Jeffrey Cheah Biomedical Centre

19 Puddicombe Way

20 Cambridge CB2 0AW, UK

21 Tel: +44 1223 331491

22 [rkg20@cam.ac.uk](mailto:rkg20@cam.ac.uk)

23

24 Key words: SARS-CoV-2; COVID-19; antibody escape; neutralising antibodies; mutation;

25 evasion; resistance; fitness; evolution

26

27

28

29

30

31

32 **Abstract**

33 SARS-CoV-2 Spike amino acid replacements in the receptor binding domain (RBD) occur  
34 relatively frequently and some have a consequence for immune recognition. Here we report  
35 recurrent emergence and significant onward transmission of a six nucleotide deletion in the  
36 Spike gene, which results in loss of two amino acids:  $\Delta$ H69/ $\Delta$ V70. Of particular note this  
37 deletion often co-occurs with the receptor binding motif amino acid replacements N501Y,  
38 N439K and Y453F. In addition, we report a sub-lineage of over 350 sequences bearing seven  
39 spike mutations across the RBD (N501Y, A570D), S1 ( $\Delta$ H69/V70) and S2 (P681H, T716I,  
40 S982A and D1118H) in England. Some of these mutations have possibly arisen as a result of  
41 the virus evolving from immune selection pressure in infected individuals. Enhanced  
42 surveillance for the  $\Delta$ H69/ $\Delta$ V70 deletion with and without RBD mutations should be  
43 considered as a priority.

44

45 **Background**

46 SARS-CoV-2's Spike surface glycoprotein engagement of ACE2 is essential for virus entry and  
47 infection<sup>1</sup>, and the receptor is found in respiratory and gastrointestinal tracts<sup>2</sup>. Despite this  
48 critical interaction and related mutational constraints, it appears the RBD can tolerate  
49 mutations in this region<sup>3,4</sup>, raising the real possibility of virus escape from vaccines and  
50 monoclonal antibodies. Spike mutants exhibiting reduced susceptibility to monoclonal  
51 antibodies have been identified in *in vitro* screens<sup>5,6</sup>. Some of these have been found in  
52 clinical isolates<sup>7</sup>. The unprecedented scale of whole genome SARS-CoV-2 sequencing has  
53 enabled identification and epidemiological analysis of transmission. As of December 11<sup>th</sup>,  
54 there were 246,534 SARS-CoV-2 sequences available in the GISAID initiative  
55 (<https://gisaid.org/>).

56

57 We recently documented *de novo* emergence of antibody escape mediated by Spike in an  
58 individual treated with convalescent plasma (CP), on the background of D614G<sup>8</sup>. Similarly,  
59 deletions in the NTD have been reported to provide escape for N-Terminal Domain-specific  
60 neutralising antibodies<sup>11</sup>. Dynamic changes in prevalence of Spike variants  $\Delta$ H69/ $\Delta$ V70 (an  
61 out of frame deletion) and D796H variant followed repeated use of CP, and *in vitro* the  
62 mutant displayed reduced susceptibility to the CP and multiple other sera, whilst retaining  
63 infectivity comparable to wild type<sup>8</sup>. We hypothesised that Spike  $\Delta$ H69/ $\Delta$ V70 arises either

64 as a compensatory change and/or antibody evasion mechanism as suggested for other NTD  
65 deletions<sup>1</sup>, and therefore aimed to characterise specific circumstances around emergence of  
66  $\Delta$ H69/ $\Delta$ V70 globally. Here we analysed the publicly available GISAID data for circulating  
67 SARS-CoV-2 sequences containing  $\Delta$ H69/ $\Delta$ V70.

68

## 69 **Results**

70 A deletion H69/V70 was present in over 3,000 sequences worldwide (2.5% of the available  
71 data) (Figure 1), and largely in Europe from where most of the sequences in GISAID are  
72 derived (Table 1). Many are from the UK and Denmark where sequencing rates are high  
73 compared to other countries.  $\Delta$ H69/ $\Delta$ V70 is observed in multiple different lineages,  
74 representing at least five independent acquisitions of the SARS-CoV-2 Spike  $\Delta$ H69/ $\Delta$ V70  
75 deletion (Figure 1). The earliest samples that include the  $\Delta$ H69/ $\Delta$ V70 were detected in  
76 Thailand and Germany in January and February 2020, respectively, and are independent  
77 deletion events. The prevalence has since increased in other countries since August 2020  
78 (Table 1). Further analysis of sequences revealed firstly that single deletions of either 69 or  
79 70 were uncommon and secondly that some lineages of  $\Delta$ H69/ $\Delta$ V70 alone were present, as  
80 well as  $\Delta$ H69/ $\Delta$ V70 in the context of other mutations in Spike, specifically those in the RBD  
81 (Figure 1).

82

83 The structural impact of the double deletion was predicted by homology modelling of the  
84 spike NTD possessing  $\Delta$ H69/ $\Delta$ V70 using SWISS-MODEL. The  $\Delta$ H69/ $\Delta$ V70 deletion was  
85 predicted to alter the conformation of a protruding loop comprising residues 69-76, with  
86 the loop being predicted to be pulled in towards the NTD (Fig 2A). In the pre- and post-  
87 deletion conformations, the positions of the alpha carbons of residues 67 and 68 are  
88 roughly equivalent whereas the position of Ser71 in the post-deletion structure is estimated  
89 to have moved by approximately 6.7Å to approximately occupy the position of His69 in the  
90 pre-deletion structure. Concurrently, the positions of Gly72, Thr73, Asn74 and Gly75 are  
91 predicted to have changed by 6.5Å, 6.5Å, 4.7Å and 1.9Å respectively, with the overall effect  
92 of drawing these residues inwards, resulting in a less dramatically protruding loop; the  
93 position of Thr76 in the post-deletion model is roughly equivalent to its position in the pre-  
94 deletion structure.

95

96 We next examined the lineages where Spike mutations in the RBD were identified at high  
97 frequency, in particular co-occurring with N439K, an amino acid replacement recently  
98 reported to be expanding in Europe and detected across the world<sup>3</sup> (Figure 3,  
99 Supplementary figure 1). N439K appears to have reduced susceptibility to a small subset of  
100 monoclonals targeting the RBD, whilst retaining affinity for ACE2 *in vitro*<sup>3</sup>. The proportion of  
101 viruses with  $\Delta$ H69/ $\Delta$ V70 only increased from August 2020 when it co-occurred with the  
102 second N439K lineage<sup>3</sup> (Figure 3). As of November 26<sup>th</sup>, remarkably there were twice as  
103 many cumulative sequences with the deletion as compared to the single N439K (Figure 3).  
104 Due to their high sampling rates the country with the highest proportion of N439K+  
105  $\Delta$ H69/ $\Delta$ V70 versus N439K alone is England. The low levels of sequencing in most countries  
106 indicate N439K's prevalence could be relatively high<sup>3</sup>. In Scotland, where early growth of  
107 N439K was high (forming N439K lineage i that subsequently went extinct with other  
108 lineages after the lockdown<sup>3</sup>), there is now an inverse relationship with 546 versus 177  
109 sequences for N439K and N439K+ $\Delta$ H69/ $\Delta$ V70 respectively (as of November 26<sup>th</sup>). These  
110 differences therefore likely reflect differing epidemic growth characteristics and timings of  
111 the introductions the N439K variants with or without the deletion.

112

113 The second significant cluster with  $\Delta$ H69/ $\Delta$ V70 and RBD mutants involves Y453F, another  
114 RBD mutation that increases binding affinity to ACE2, along with F486L and N501T related  
115 to human-mink transmissions in Denmark<sup>9</sup> (Figure 4). This sub-lineage, termed 'Cluster 5'  
116 was part of a wider lineage in which the same deleted region ( $\Delta$ H69/ $\Delta$ V70) was observed. In  
117 Y453F lineages, the mutant virus demonstrates reduced susceptibility to sera from  
118 recovered COVID-19 patients ([https://files.ssi.dk/Mink-cluster-5-short-report\\_AFO2](https://files.ssi.dk/Mink-cluster-5-short-report_AFO2)). The  
119  $\Delta$ H69/ $\Delta$ V70 was first detected in the Y453F background on August 24<sup>th</sup> and thus far appears  
120 limited to Danish sequences.

121

122 A third lineage containing the same out of frame deletion  $\Delta$ H69/ $\Delta$ V70 has arisen with  
123 another RBD mutation N501Y (Figure 5, supplementary figure 2). Based on its location it  
124 might be expected to escape antibodies similar to COV2-2499<sup>5</sup>. In addition, when SARS-CoV-  
125 2 was passaged in mice for adaptation purposes, N501Y emerged and increased  
126 pathogenicity<sup>10</sup>. Early sequences with N501Y alone were isolated both in Brazil and USA in  
127 April 2020. N501Y +  $\Delta$ H69/ $\Delta$ V70 sequences appear to have been detected first in the UK in

128 September 2020, with the crude cumulative number of N501Y +  $\Delta$ H69/ $\Delta$ V70 mutated  
129 sequences now exceeding the single mutant (Figure 5). Of particular concern is a sub-  
130 lineage of around 350 sequences (Figure 6) bearing six spike mutations across the RBD  
131 (N501Y, A570D) and S2 (P681H, T716I, S982A and D1118H) as well as the  $\Delta$ H69/ $\Delta$ V70 in  
132 England (Figure 7). This cluster has a very long branch (Figure 6).

133

## 134 **Discussion**

135 We have presented data demonstrating multiple, independent, and circulating lineages of  
136 SARS-CoV-2 variants bearing a Spike  $\Delta$ H69/ $\Delta$ V70. This deletion spanning six nucleotides, is  
137 mostly due to an out of frame deletion of six nucleotides, has frequently followed receptor  
138 binding amino acid replacements (N501Y, N439K and Y453F that have been shown to  
139 reduce binding with monoclonal antibodies) and its prevalence is rising in parts of Europe,  
140 with the greatest increases since August 2020.

141

142 A recent analysis highlighted the potential for enhanced transmissibility of viruses with  
143 deletions in the N terminal domain, including  $\Delta$ H69/ $\Delta$ V70<sup>11</sup>. The potential for SARS-CoV-2  
144 mutations to rapidly emerge and fix is exemplified by D614G, an amino acid replacement in  
145 S2 that alters linkages between S1 and S2 subunits on adjacent protomers as well as RBD  
146 orientation, infectivity, and transmission<sup>12-14</sup>. The example of D614G also demonstrates that  
147 mechanisms directly impacting important biological processes can be indirect. Similarly, a  
148 number of possible mechanistic explanations may underlie  $\Delta$ H69/ $\Delta$ V70. For example, the  
149 fact that it sits on an exposed surface might be suggestive of immune interactions and  
150 escape, although allosteric interactions could alternatively lead to higher infectivity.

151

152 The finding of a sub-lineage of over 350 sequences bearing seven spike mutations across the  
153 RBD (N501Y, A570D), S1 ( $\Delta$ H69/ $\Delta$ V70) and S2 (P681H, T716I, S982A and D1118H) in England  
154 requires careful monitoring. The detection of a high number of novel mutations suggests  
155 this lineage has either been introduced from a geographic region with very poor sampling or  
156 viral evolution may have occurred in a single individual in the context of a chronic infection<sup>8</sup>.

157

158 Given the emergence of multiple clusters of variants carrying RBD mutations and the  
159  $\Delta$ H69/ $\Delta$ V70 deletion, limitation of transmission takes on a renewed urgency. Concerted

160 global vaccination efforts with wide coverage should be accelerated. Continued emphasis  
161 on testing/tracing, social distancing and mask wearing are essential, with investment in  
162 other novel methods to limit transmission<sup>15</sup>. Detection of the deletion by rapid diagnostics  
163 should be a research priority as such tests could be used as a proxy for antibody escape  
164 mutations to inform surveillance at global scale.

165

## 166 **Acknowledgements**

167 RKG is supported by a Wellcome Trust Senior Fellowship in Clinical Science (WT108082AIA).  
168 DLR is funded by the MRC (MC UU 1201412). WH is funded by the MRC (MR/R024758/1).  
169 We thank Dr James Voss for the kind gift of HeLa cells stably expressing ACE2.

170

## 171 **Conflicts of interest**

172 RKG has received consulting fees from UMOVIS lab, Gilead Sciences and ViiV Healthcare,  
173 and a research grant from InvisiSmart Technologies.

174

## 175 **Methods**

### 176 *Phylogenetic Analysis*

177 All available full-genome SARS-CoV-2 sequences were downloaded from the GISAID  
178 database (<http://gisaid.org/>)<sup>16</sup> on 26<sup>th</sup> November. Duplicate and low-quality sequences  
179 (>5% N regions) were removed, leaving a dataset of 194,265 sequences with a length of  
180 >29,000bp. All sequences were realigned to the SARS-CoV-2 reference strain MN908947.3,  
181 using MAFFT v7.473 with automatic flavour selection and the --keeplength --addfragments  
182 options<sup>17</sup>. Major SARS-CoV-2 clade memberships were assigned to all sequences using the  
183 Nextclade server v0.9 (<https://clades.nextstrain.org/>).

184

185 Maximum likelihood phylogenetic trees were produced using the above curated dataset  
186 using IQ-TREE v2.1.2<sup>18</sup>. Evolutionary model selection for trees were inferred using  
187 ModelFinder<sup>19</sup> and trees were estimated using the GTR+F+I model with 1000 ultrafast  
188 bootstrap replicates<sup>20</sup>. All trees were visualised with Figtree v.1.4.4  
189 (<http://tree.bio.ed.ac.uk/software/figtree/>), rooted on the SARS-CoV-2 reference sequence  
190 and nodes arranged in descending order. Nodes with bootstraps values of <50 were  
191 collapsed using an in-house script.

192

193 *Pseudotype virus preparation*

194 Viral vectors were prepared by transfection of 293T cells by using Fugene HD transfection  
195 reagent (Promega). 293T cells were transfected with a mixture of 11ul of Fugene HD, 1µg of  
196 pCDNAΔ19Spike-HA, 1ug of p8.91 HIV-1 gag-pol expression vector<sup>22,23</sup>, and 1.5µg of pCSFLW  
197 (expressing the firefly luciferase reporter gene with the HIV-1 packaging signal). Viral  
198 supernatant was collected at 48 and 72h after transfection, filtered through 0.45um filter  
199 and stored at -80°C as previously described<sup>24</sup>. Infectivity was measured by luciferase  
200 detection in target TZMBL transduced to express TMPRSS2 and ACE2.

201

202 *Normalisation of virus titre by SG-PERT to measure RT activity in lentivirus preparation*

203 Supernatant was subjected to SG-PERT as previously described.<sup>25</sup>

204

205 *Homology modelling*

206 Prediction of conformational change in the spike N-terminal assessed by homology  
207 modelling of the NTD (residues 14-306) predicted by homology modelling using SWISS-  
208 MODEL<sup>26</sup> with template chain A of PDB 7C2L<sup>27</sup> and aligned with 7C2L using PyMOL. Figures  
209 prepared with PyMOL (Schrödinger) using PDBs 7C2L, 6ZGE28 and 6ZGG<sup>28</sup>.

210

211

212 1 Zhou, P. *et al.* A pneumonia outbreak associated with a new coronavirus of probable bat  
213 origin. *Nature* 579, 270-273, doi:10.1038/s41586-020-2012-7 (2020).

214 2 Sungnak, W. *et al.* SARS-CoV-2 entry factors are highly expressed in nasal epithelial cells  
215 together with innate immune genes. *Nature medicine* 26, 681-687, doi:10.1038/s41591-  
216 020-0868-6 (2020).

217 3 Thomson, E. C. *et al.* The circulating SARS-CoV-2 spike variant N439K maintains fitness  
218 while evading antibody-mediated immunity. *bioRxiv*, 2020.2011.2004.355842,  
219 doi:10.1101/2020.11.04.355842 (2020).

220 4 Starr, T. N. *et al.* Deep Mutational Scanning of SARS-CoV-2 Receptor Binding Domain  
221 Reveals Constraints on Folding and ACE2 Binding. *Cell* 182, 1295-1310 e1220,  
222 doi:10.1016/j.cell.2020.08.012 (2020).

- 223 5 Greaney, A. J. *et al.* Complete Mapping of Mutations to the SARS-CoV-2 Spike Receptor-  
224 Binding Domain that Escape Antibody Recognition. *Cell host & microbe*,  
225 doi:10.1016/j.chom.2020.11.007 (2020).
- 226 6 Starr, T. N. *et al.* Prospective mapping of viral mutations that escape antibodies used to  
227 treat COVID-19. *bioRxiv*, doi:10.1101/2020.11.30.405472 (2020).
- 228 7 Choi, B. *et al.* Persistence and Evolution of SARS-CoV-2 in an Immunocompromised Host.  
229 *N Engl J Med*, doi:10.1056/NEJMc2031364 (2020).
- 230 8 Kemp, S. A. *et al.* Neutralising antibodies drive Spike mediated SARS-CoV-2 evasion.  
231 *medRxiv*, 2020.2012.2005.20241927, doi:10.1101/2020.12.05.20241927 (2020).
- 232 9 Oude Munnink, B. B. *et al.* Transmission of SARS-CoV-2 on mink farms between humans  
233 and mink and back to humans. *Science*, doi:10.1126/science.abe5901 (2020).
- 234 10 Gu, H. *et al.* Adaptation of SARS-CoV-2 in BALB/c mice for testing vaccine efficacy. *Science*  
235 369, 1603-1607, doi:10.1126/science.abc4730 (2020).
- 236 11 McCarthy, K. R. *et al.* Natural deletions in the SARS-CoV-2 spike glycoprotein drive  
237 antibody escape. *bioRxiv*, 2020.2011.2019.389916, doi:10.1101/2020.11.19.389916  
238 (2020).
- 239 12 Korber, B. *et al.* Tracking Changes in SARS-CoV-2 Spike: Evidence that D614G Increases  
240 Infectivity of the COVID-19 Virus. *Cell*, doi:10.1016/j.cell.2020.06.043 (2020).
- 241 13 Yurkovetskiy, L. *et al.* Structural and Functional Analysis of the D614G SARS-CoV-2 Spike  
242 Protein Variant. *Cell* 183, 739-751 e738, doi:10.1016/j.cell.2020.09.032 (2020).
- 243 14 Hou, Y. J. *et al.* SARS-CoV-2 D614G variant exhibits efficient replication ex vivo and  
244 transmission in vivo. *Science*, doi:10.1126/science.abe8499 (2020).
- 245 15 Mlcochova, P. *et al.* Extended in vitro inactivation of SARS-CoV-2 by titanium dioxide  
246 surface coating. *bioRxiv*, 2020.2012.2008.415018, doi:10.1101/2020.12.08.415018  
247 (2020).
- 248 16 Shu, Y. & McCauley, J. GISAID: Global initiative on sharing all influenza data - from vision  
249 to reality. *Euro surveillance : bulletin Europeen sur les maladies transmissibles = European*  
250 *communicable disease bulletin* 22, 30494, doi:10.2807/1560-7917.ES.2017.22.13.30494  
251 (2017).
- 252 17 Katoh, K. & Standley, D. M. MAFFT Multiple Sequence Alignment Software Version 7:  
253 Improvements in Performance and Usability. *Molecular Biology and Evolution* 30, 772-  
254 780, doi:10.1093/molbev/mst010 (2013).



- 255 18 Minh, B. Q. *et al.* IQ-TREE 2: New Models and Efficient Methods for Phylogenetic  
256 Inference in the Genomic Era. *Molecular Biology and Evolution* 37, 1530-1534,  
257 doi:10.1093/molbev/msaa015 (2020).
- 258 19 Kalyaanamoorthy, S., Minh, B. Q., Wong, T. K. F., von Haeseler, A. & Jermiin, L. S.  
259 ModelFinder: fast model selection for accurate phylogenetic estimates. *Nature Methods*  
260 14, 587-589, doi:10.1038/nmeth.4285 (2017).
- 261 20 Minh, B. Q., Nguyen, M. A. T. & von Haeseler, A. Ultrafast Approximation for  
262 Phylogenetic Bootstrap. *Molecular Biology and Evolution* 30, 1188-1195,  
263 doi:10.1093/molbev/mst024 (2013).
- 264 21 Sagulenko, P., Puller, V. & Neher, R. A. TreeTime: Maximum-likelihood phylodynamic  
265 analysis. *Virus evolution* 4, vex042-vex042, doi:10.1093/ve/vex042 (2018).
- 266 22 Naldini, L., Blomer, U., Gage, F. H., Trono, D. & Verma, I. M. Efficient transfer, integration,  
267 and sustained long-term expression of the transgene in adult rat brains injected with a  
268 lentiviral vector. *Proceedings of the National Academy of Sciences of the United States of*  
269 *America* 93, 11382-11388 (1996).
- 270 23 Gupta, R. K. *et al.* Full-length HIV-1 Gag determines protease inhibitor susceptibility  
271 within in vitro assays. *Aids* 24, 1651-1655, doi:10.1097/QAD.0b013e3283398216 (2010).
- 272 24 Mlcochova, P. *et al.* Combined point of care nucleic acid and antibody testing for SARS-  
273 CoV-2 following emergence of D614G Spike Variant. *Cell Rep Med*, 100099,  
274 doi:10.1016/j.xcrm.2020.100099 (2020).
- 275 25 Gregson, J. *et al.* HIV-1 viral load is elevated in individuals with reverse transcriptase  
276 mutation M184V/I during virological failure of first line antiretroviral therapy and is  
277 associated with compensatory mutation L74I. *The Journal of infectious diseases*,  
278 doi:10.1093/infdis/jiz631 (2019).
- 279 26 Waterhouse *et al.* SWISS-MODEL: homology modelling of protein structures and  
280 complexes. *Nucleic Acids Res* 46, 296-303, doi:<https://doi.org/10.1093/nar/gky427>  
281 (2018).
- 282 27 Chi *et al.* A neutralizing human antibody binds to the N-terminal domain of the Spike  
283 protein of SARS-CoV-2. *Science* 369, 650-655, doi:10.1126/science.abc6952 (2020).
- 284 28 Wrobel *et al.* SARS-CoV-2 and bat RaTG13 spike glycoprotein structures inform on virus  
285 evolution and furin-cleavage effects. *Nat Struct Mol Biol* 27, 763-767,  
286 doi:10.1038/s41594-020-0468-7 (2020).

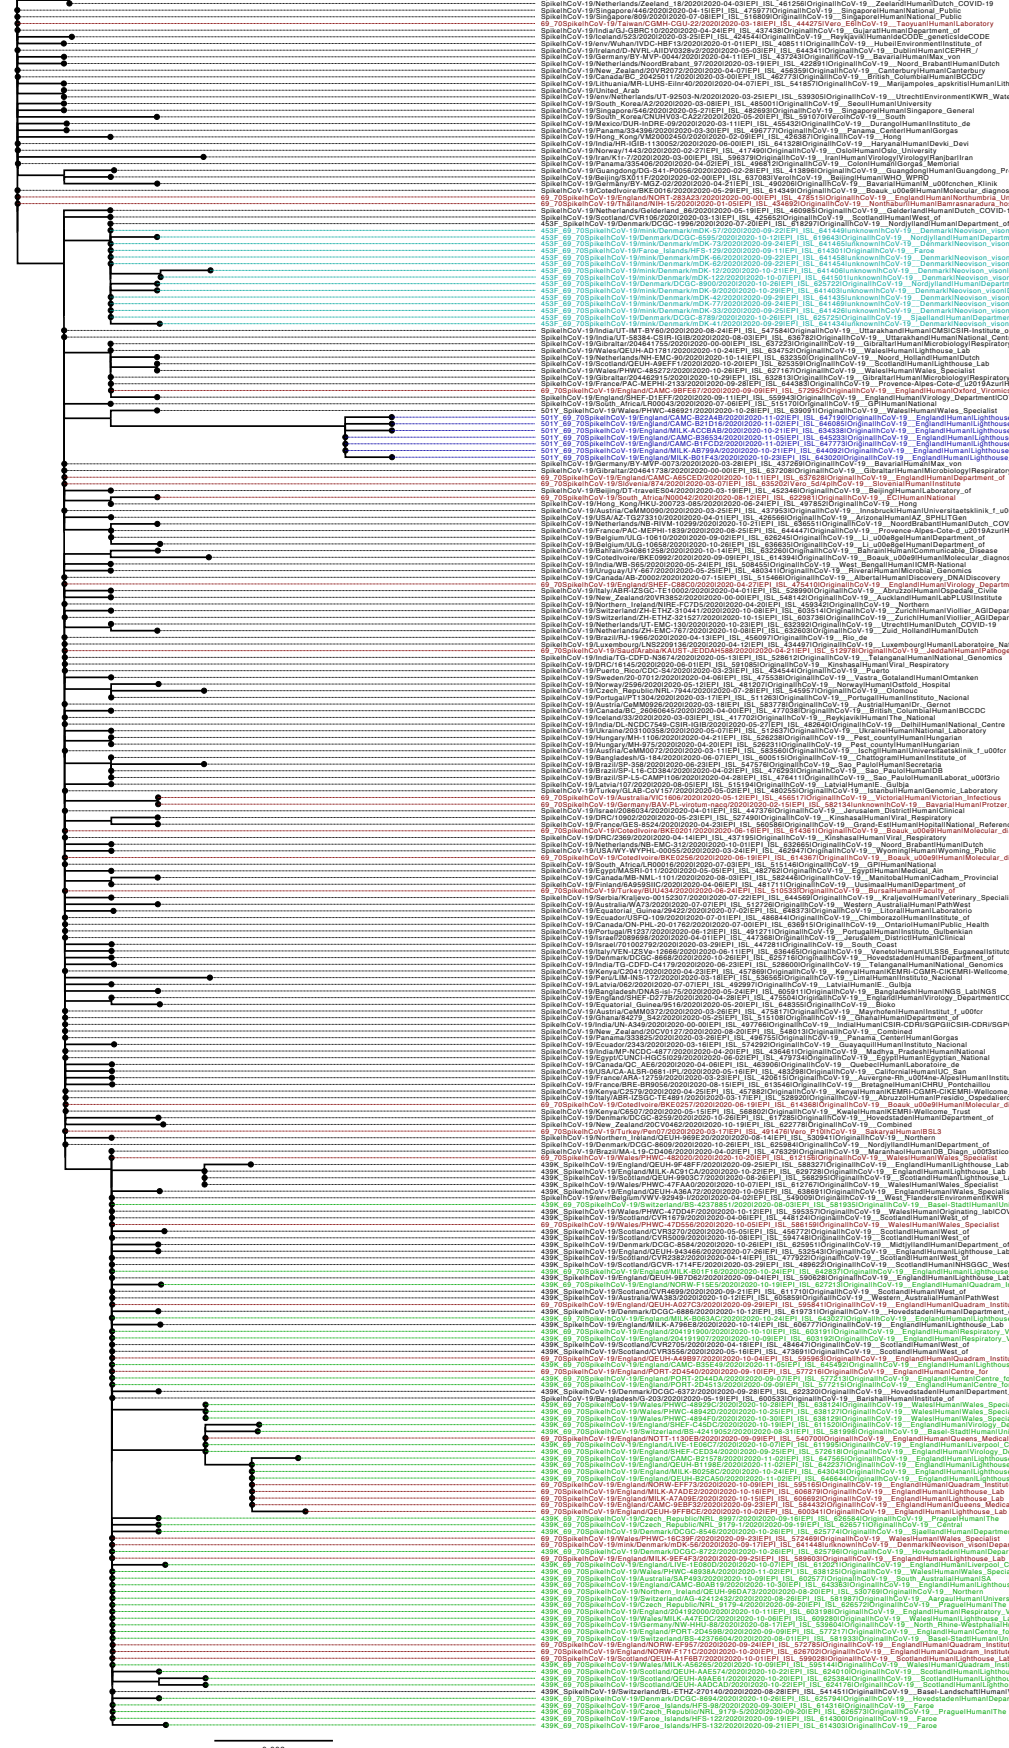

**Figure 1. Global spike-only phylogeny of SARS-CoV-2 sequences carrying the Spike ΔH69/V70 deletion.** All sequences carrying the double-deletion were downloaded from the GISAID database and aligned to the Wuhan-Hu-1 reference strain using MAFFT. A series of global background sequences were also downloaded and used to place mutants into context. All duplicate sequences were removed. The inferred phylogeny suggests that there are multiple lineages of sequences carrying the ΔH69/V70, by itself (red), as well as with RDB mutations N501Y (dark blue), N453F (cyan) and Y439K (green).

|                                                            |                  | Jan | Feb | Mar | Apr | May | Jun | Jul | Aug | Sep        | Oct        | Nov        | Total      |      |
|------------------------------------------------------------|------------------|-----|-----|-----|-----|-----|-----|-----|-----|------------|------------|------------|------------|------|
| All $\Delta$ H69/V70 and RBD mutations 439K, 453F and 501Y | Australia        |     |     |     |     | 1   | 1   |     |     | 1          | 2          |            | 5          |      |
|                                                            | Burkina Faso     |     |     |     |     |     |     |     | 1   | 1          |            |            | 2          |      |
|                                                            | Canada           |     |     |     |     |     |     |     |     | 1          |            |            | 1          |      |
|                                                            | Cote d'Ivoire    |     |     |     |     |     | 5   |     |     |            |            |            | 5          |      |
|                                                            | Czech Republic   |     |     |     |     |     |     |     |     | 12         | 53         |            | 65         |      |
|                                                            | Denmark          |     |     |     | 1   |     |     |     |     | <b>53</b>  | <b>281</b> | <b>611</b> | <b>3</b>   | 949  |
|                                                            | England          |     |     |     | 3   |     |     |     | 2   | <b>184</b> | <b>253</b> | <b>572</b> | <b>449</b> | 1465 |
|                                                            | Faroe Islands    |     |     |     |     |     |     |     |     |            | 9          |            |            | 9    |
|                                                            | France           |     |     | 1   |     |     |     |     |     |            | 9          |            |            | 10   |
|                                                            | Germany          |     | 1   |     |     |     |     |     |     | 1          | 3          |            |            | 5    |
|                                                            | Italy            |     |     |     | 3   |     |     |     |     |            |            |            |            | 3    |
|                                                            | Malaysia         |     |     |     | 1   | 1   |     |     |     |            |            |            |            | 2    |
|                                                            | Netherlands      |     |     |     |     |     |     |     |     |            |            | 9          |            | 9    |
|                                                            | New Zealand      |     |     |     |     |     |     |     |     | 1          |            |            |            | 1    |
|                                                            | Northern Ireland |     |     |     |     |     |     |     |     | 20         | 1          | 1          |            | 22   |
|                                                            | Norway           |     |     |     |     |     |     |     |     |            | 1          |            |            | 1    |
|                                                            | Saudi Arabia     |     |     |     |     | 1   |     |     |     |            |            |            |            | 1    |
|                                                            | Scotland         |     |     |     |     |     |     |     |     | 25         | 68         | 83         | 2          | 178  |
|                                                            | Slovenia         |     |     |     | 4   |     |     |     |     |            |            |            |            | 4    |
|                                                            | South Africa     |     |     |     |     |     |     |     | 1   |            |            |            |            | 1    |
|                                                            | Sweden           |     |     |     | 1   |     |     |     |     |            | 1          | 1          |            | 3    |
|                                                            | Switzerland      |     |     |     |     |     |     |     |     | 9          |            |            |            | 9    |
|                                                            | Taiwan           |     |     |     | 1   |     |     |     |     |            |            |            |            | 1    |
|                                                            | Thailand         | 1   |     |     |     |     |     |     |     |            |            |            |            | 1    |
|                                                            | Turkey           |     |     |     | 2   |     |     |     |     |            |            |            |            | 2    |
|                                                            | USA              |     |     |     |     | 1   |     | 1   |     |            |            |            |            | 2    |
|                                                            | Wales            |     |     |     |     |     |     |     |     | 14         | 101        | 174        | 20         | 309  |
|                                                            | Grand Total      | 1   | 1   | 13  | 7   | 1   | 7   | 3   | 308 | 742        | 1506       | 474        | 3065       |      |
| Only 69/70 (without RBD replacements)                      | Denmark          |     |     |     |     |     |     |     | 28  | 109        | 212        | 4          | 353        |      |
|                                                            | Faroe Islands    |     |     |     |     |     |     |     |     | 3          |            |            | 3          |      |
|                                                            | Turkey           |     |     |     |     |     | 1   |     |     |            |            |            | 1          |      |
|                                                            | United Kingdom   |     |     |     |     |     |     |     | 2   | 6          | 6          |            | 14         |      |
|                                                            | Grand Total      |     |     |     |     |     | 1   |     | 30  | 118        | 218        | 4          | 371        |      |

**Table 1. Number of reported SARS-CoV-2 sequences with the  $\Delta$ H69/V70 deletion.** All sequences containing the  $\Delta$ H69/V70 deletion were extracted from the GISAID database (Accessed 26<sup>th</sup> Nov 2020) and tabulated according to both reporting country of origin and date in which they were posted online. The lineages carrying  $\Delta$ H69/V70 began to expand in both Denmark and England in August 2020.

A

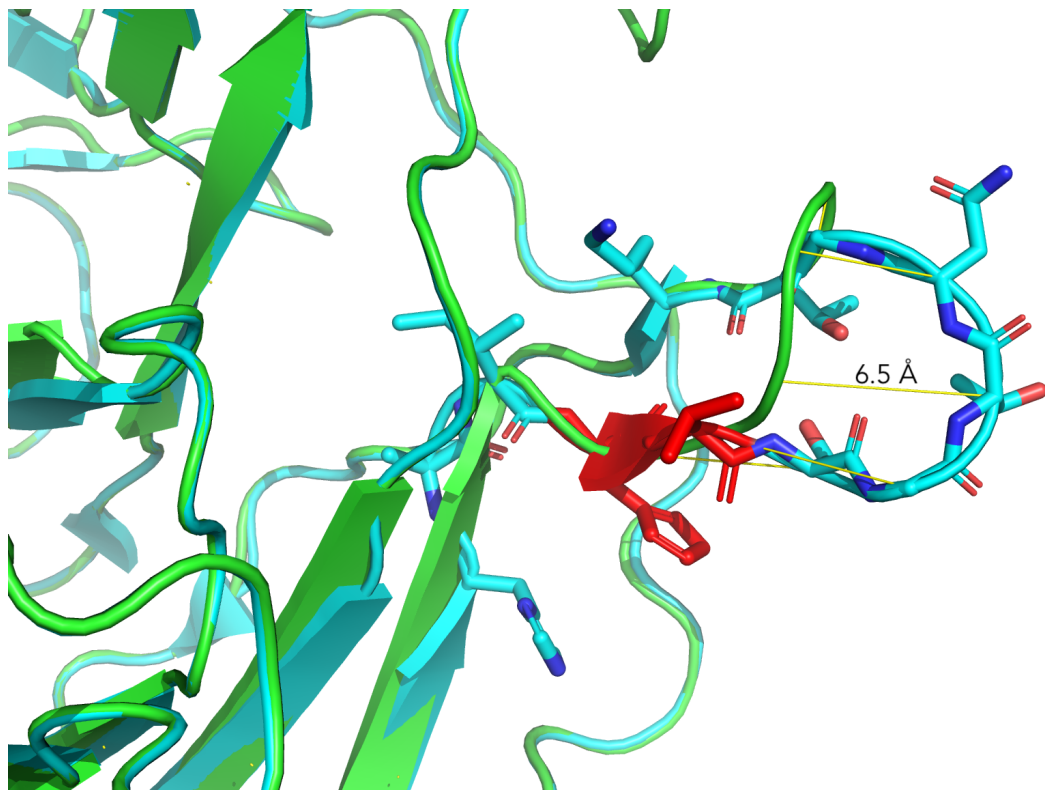

B

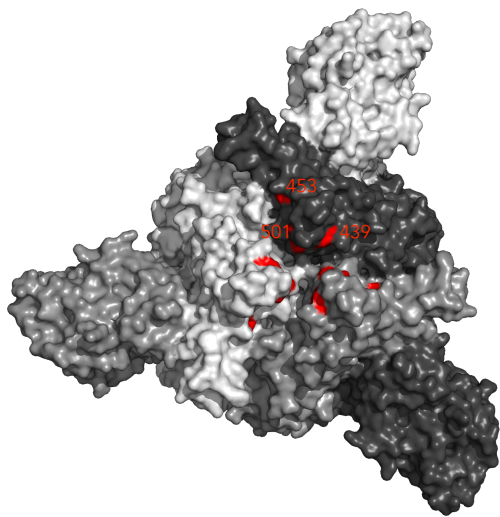

C

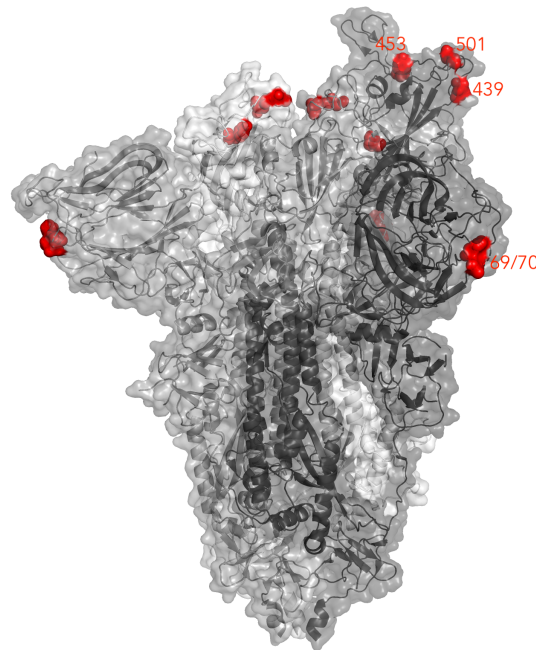

**Figure 2. Structural aspects of  $\Delta$ H69/V70** **A)** Prediction of conformational change in the spike N-terminal domain due to deletion of residues His69 and Val70. The pre-deletion structure is shown in cyan, except for residues 69 and 70, which are shown in red. The predicted post-deletion structure is shown in green. Residues 66-77 of the pre-deletion structure are shown in stick representation and coloured by atom (carbon in cyan, nitrogen in blue, oxygen in coral). Yellow lines connect aligned residues 66-77 of the pre- and post-deletion structures and the distance of 6.5 Å between aligned alpha carbons of Thr73 in the pre- and post-deletion conformation is labelled. **B)** Surface representation of spike homotrimer in closed conformation (PDB: 6ZGE, Wrobel et al., 2020) homotrimer viewed in a 'top-down' view along the trimer axis with each monomer in shown in different shades of grey and locations of RBD mutations at residues 439, 453 and 501 highlighted in red. **C)** Spike in open conformation with a single erect RBD (PDB: 6ZGG, Wrobel et al. 2020) in trimer axis vertical view with the locations of deleted residues His69 and Val70 in the N-terminal domain and RBD mutations highlighted as red spheres and labelled on the monomer with erect RBD. Residues 71-75, which form the exposed loop undergoing conformational change in A, are omitted from this structure.

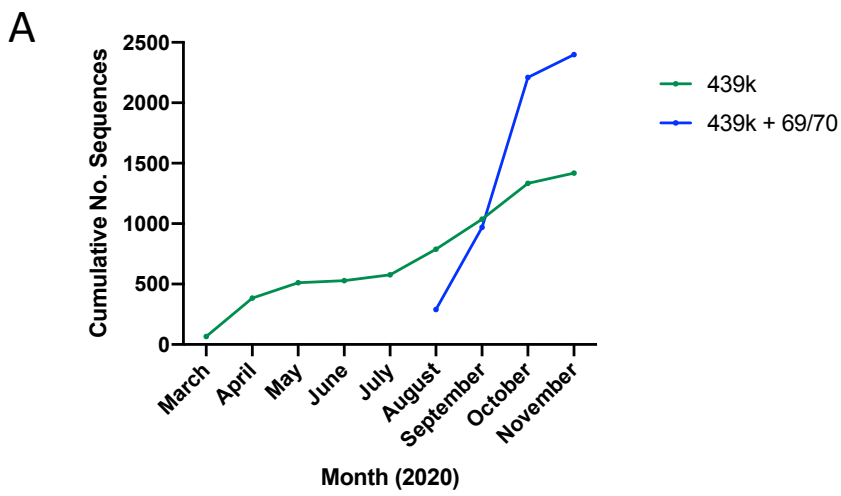

**Figure 3. The relative increase in frequency of sequences bearing Spike mutants 439K and 501Y based on sampling dates.** Between August and October 2020, an exponential increase in mutants carrying both 439K and  $\Delta$ H69/V70 saw the latter become dominant in terms of cumulative cases.

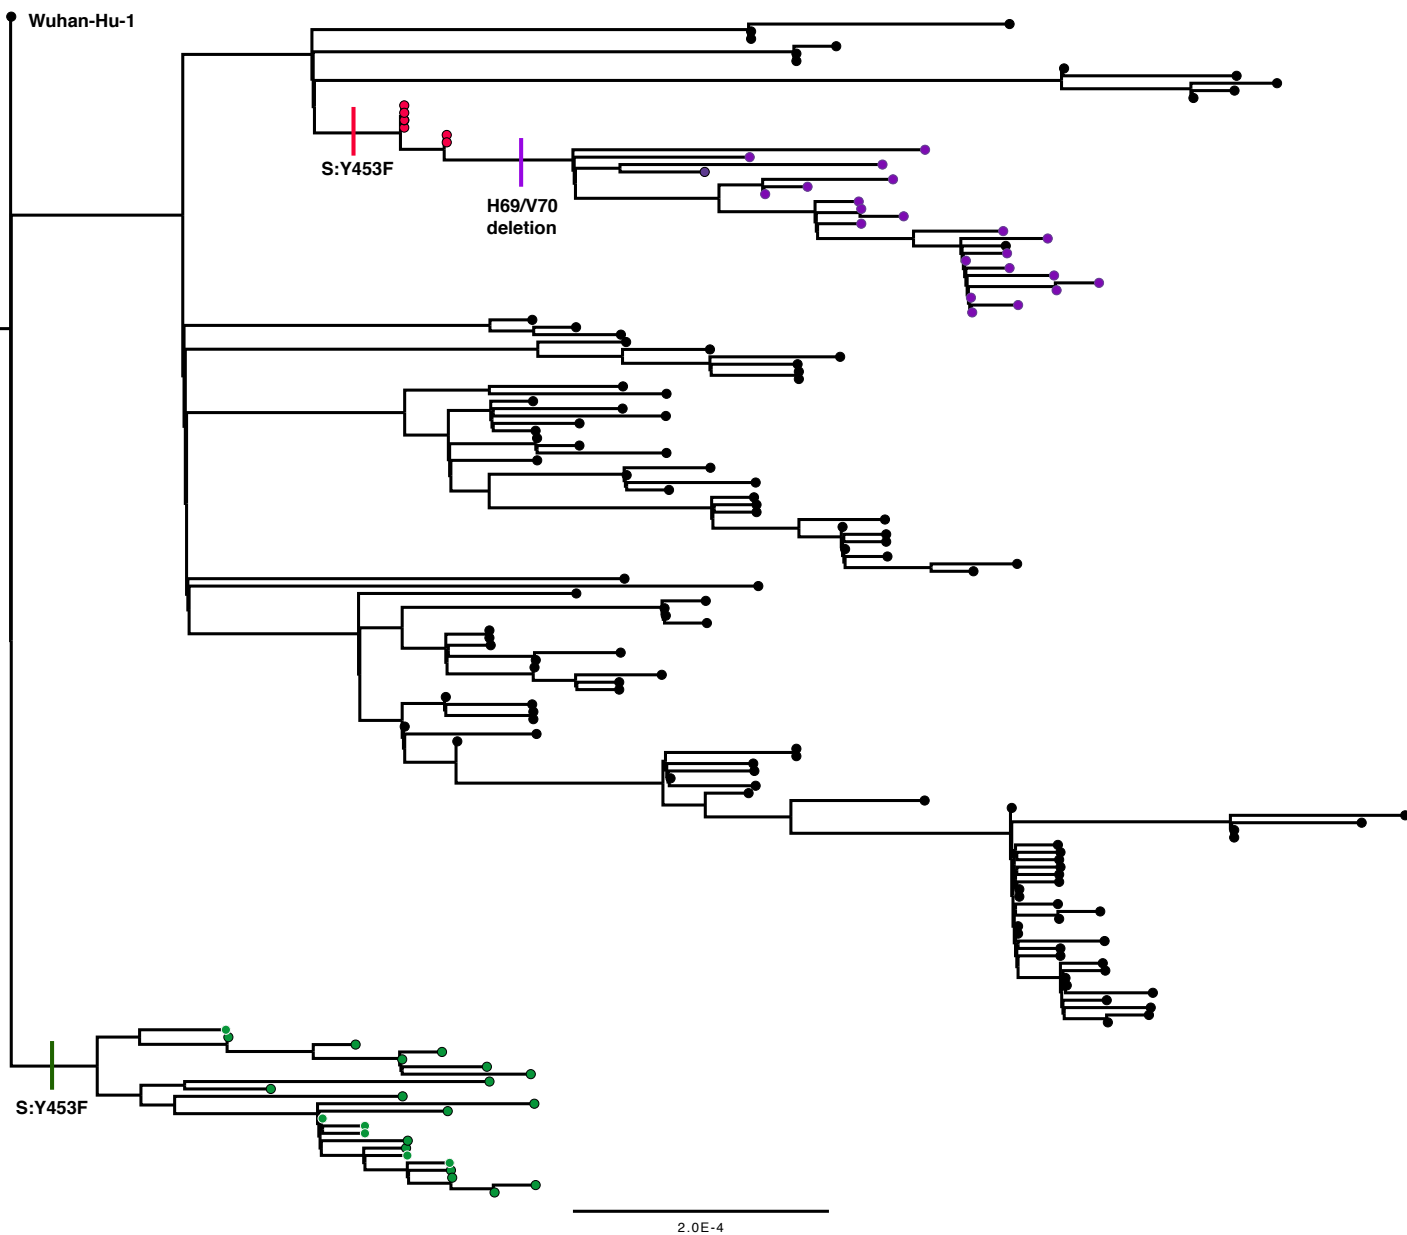

**Figure 4. Maximum likelihood phylogeny of all Mink-origin SARS-CoV-2 Spike sequences.** All 753 publicly available Mink origin Spike sequences were downloaded from the GISAID database (accessed 12<sup>th</sup> December) and aligned to the Wuhan-Hu-1 reference sequence using MAFFT. Acquisition of the Spike mutant Y453F, an exposed region in the RBD, occurred early on in Dutch Mink (green circles). Later in infection, 453F was acquired by Danish Mink (red) and subsequently, those with the 453F mutant also acquired the  $\Delta$ H69/V70 double deletion (purple).

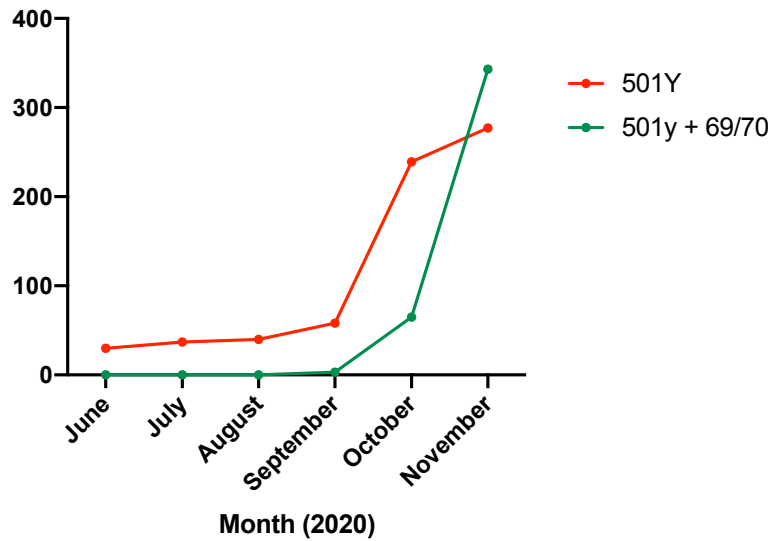

**Figure 5. The relative increase in frequency of sequences bearing Spike mutant 501Y based on sampling dates.** Between October and November 2020, the sequences carrying both 501Y and the  $\Delta$ H69/V70 also became dominant.

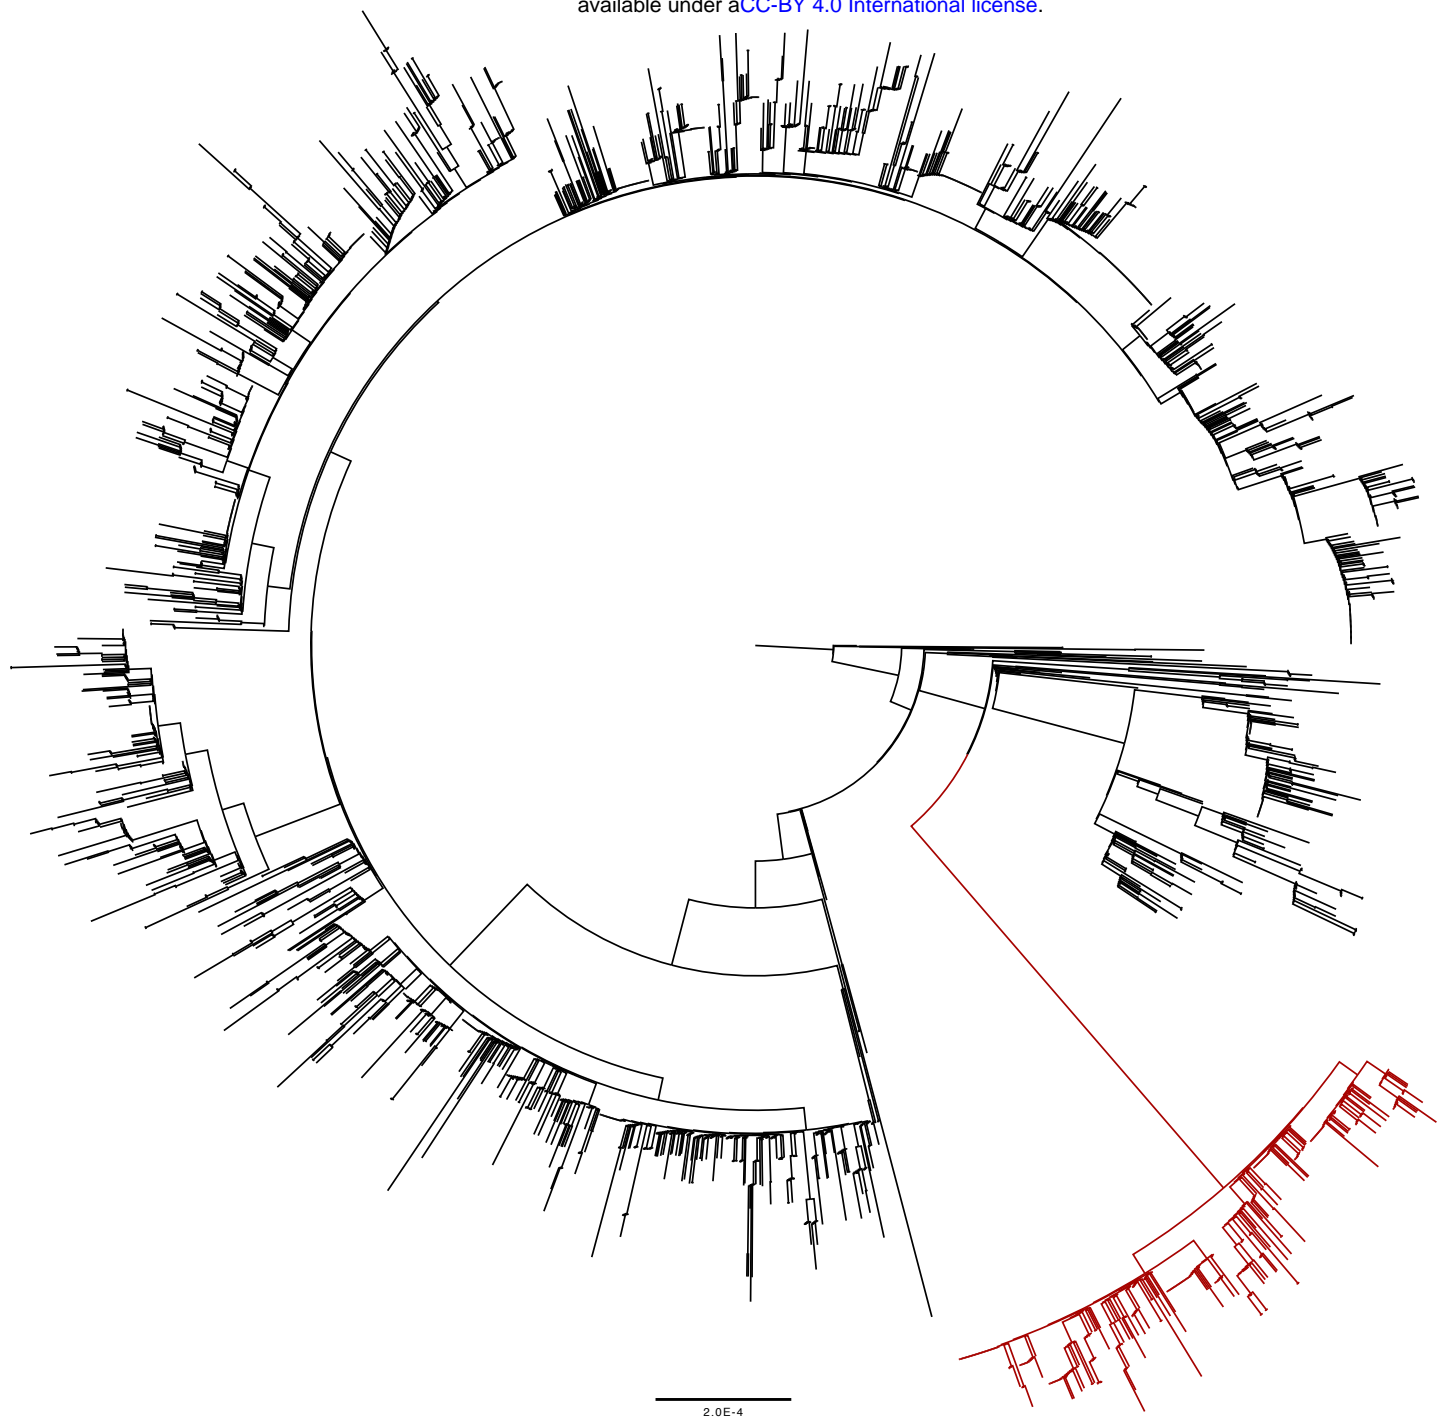

**Figure 6: Lineage bearing multiple Spike mutations including  $\Delta$ H69/V70:** Global maximum likelihood phylogeny of all  $\Delta$ H69/V70 sequences downloaded from the GISAID database (3066 sequences, accessed 26<sup>th</sup> November 2020). A distinct sub-lineage of  $\Delta$ H69/V70 sequences (red) developed with six linked S mutations, two of which are in the RBD (N501Y and A570D) and four others in S2 (P681H, T716I, S982A and D1118H). All five mutations occur together in all cases with the deletion.



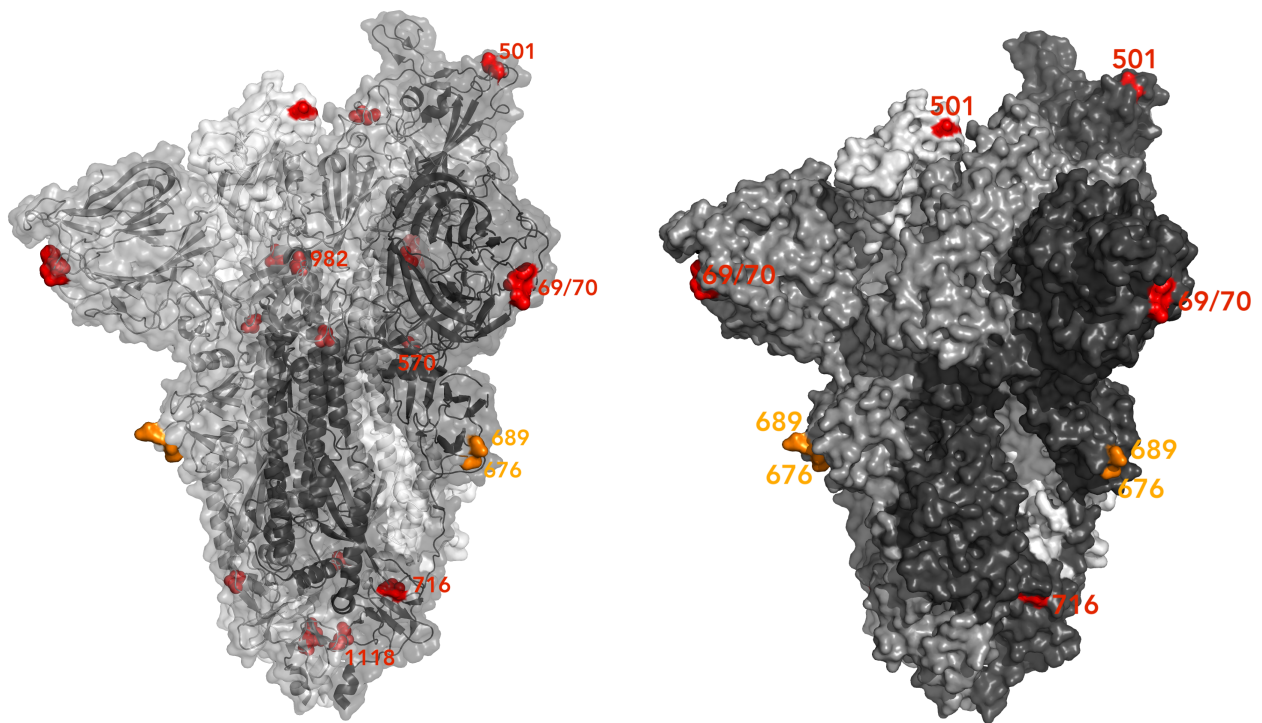

**Figure 7. Spike residues in a highly mutated circulating strain with  $\Delta$ H69/V70.** Spike homotrimer in open conformation with one upright RBD (PDB: 6ZGE, Wrobel et al., 2020) with different monomers shown in shades of grey. To the left, surface representation overlaid with ribbon representation and to the right, opaque surface representation accentuating the locations of surface-exposed residues. The deleted residues 69 and 70 and the residues involved in amino acid substitutions (501, 570, 716, 982 and 1118) are coloured red. The location of an exposed loop including residue 681 is absent from the structure, though the residues either side of the unmodelled residues, 676 and 689, are coloured orange. On the left structure, highlighted residues are labelled on the monomer with an upright RBD; on the right structure, all visible highlighted residues are labelled.

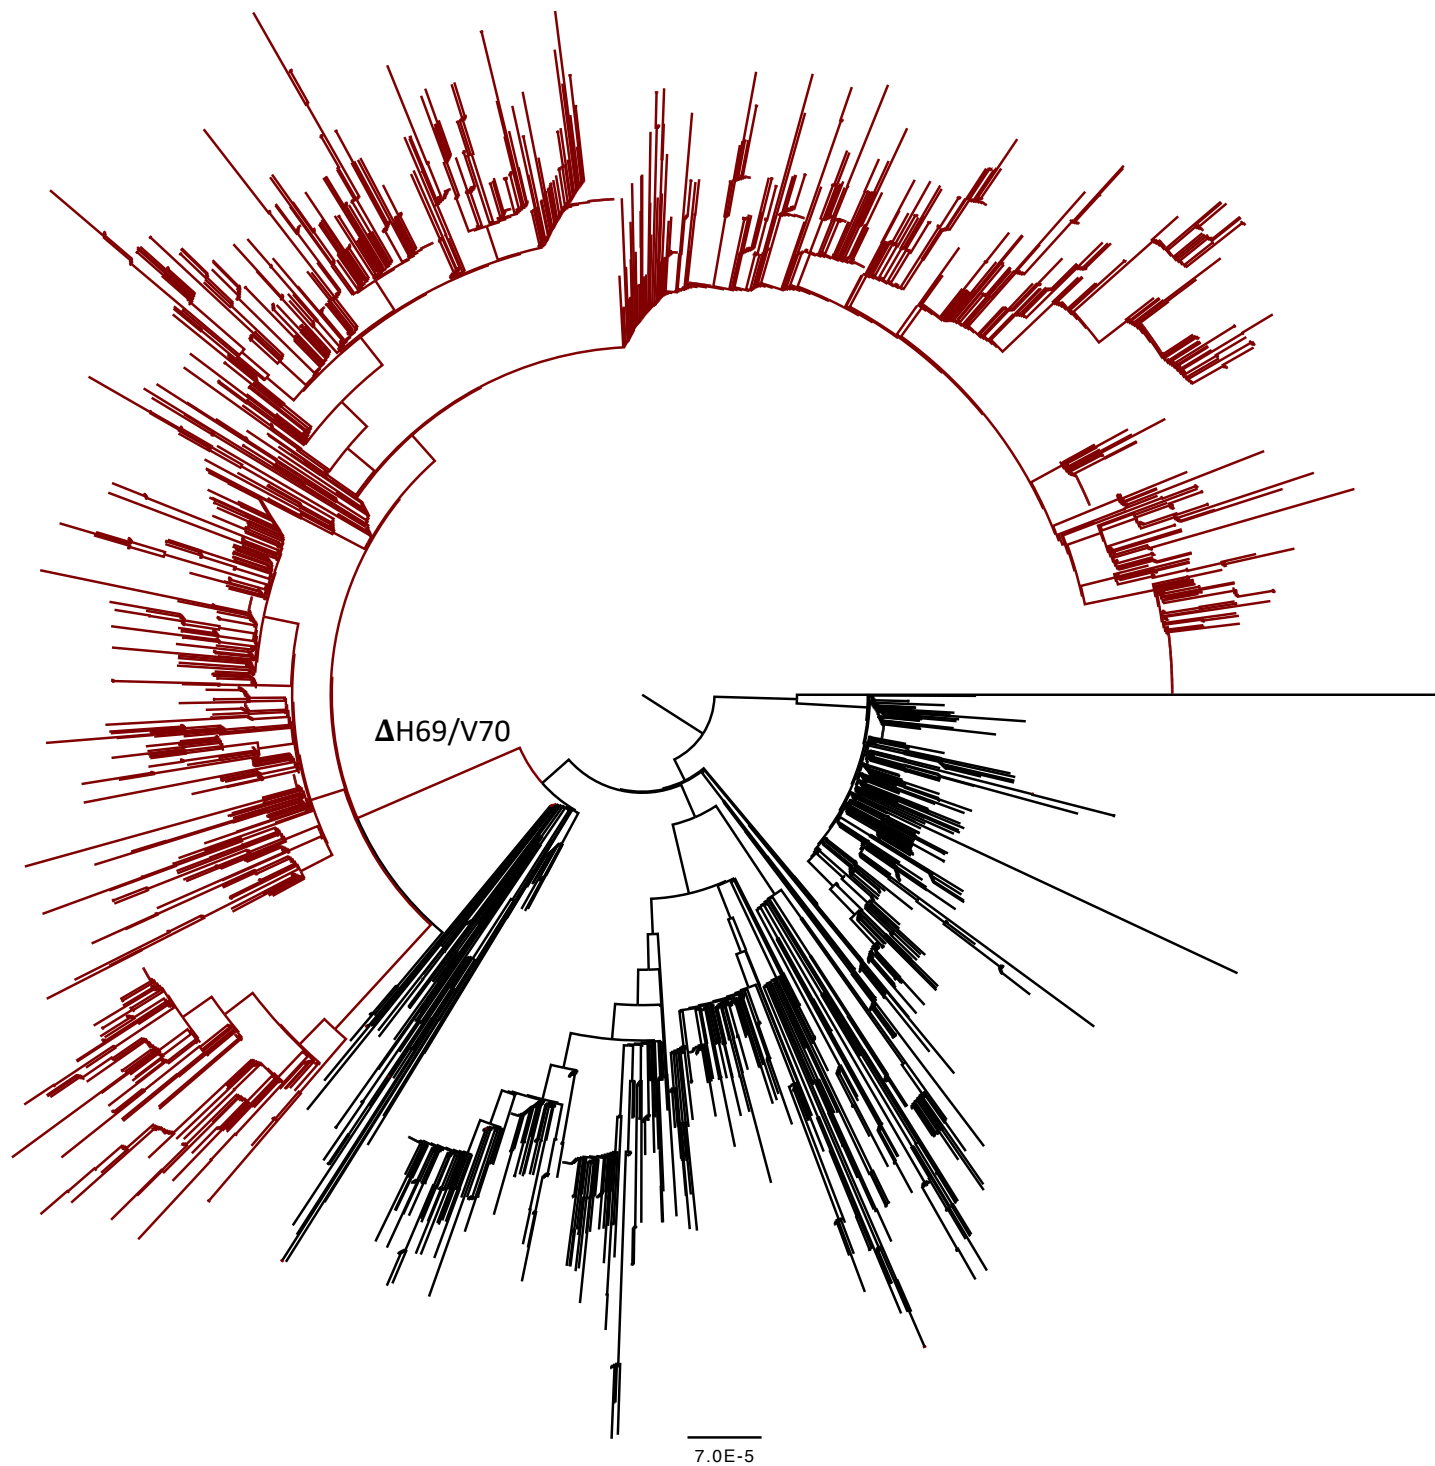

**Supplementary Figure 1. Circularised maximum likelihood phylogeny of global sequences carrying Spike mutant 439K.** All sequences in the GISAID database containing S:439K (3820 sequences, 26th November 2020) were realigned to Wuhan-Hu-1 using MAFFT. Viruses carrying the Spike double deletion  $\Delta$ H69/V70 (red) emerged and expanded from viruses with S:439K (black).

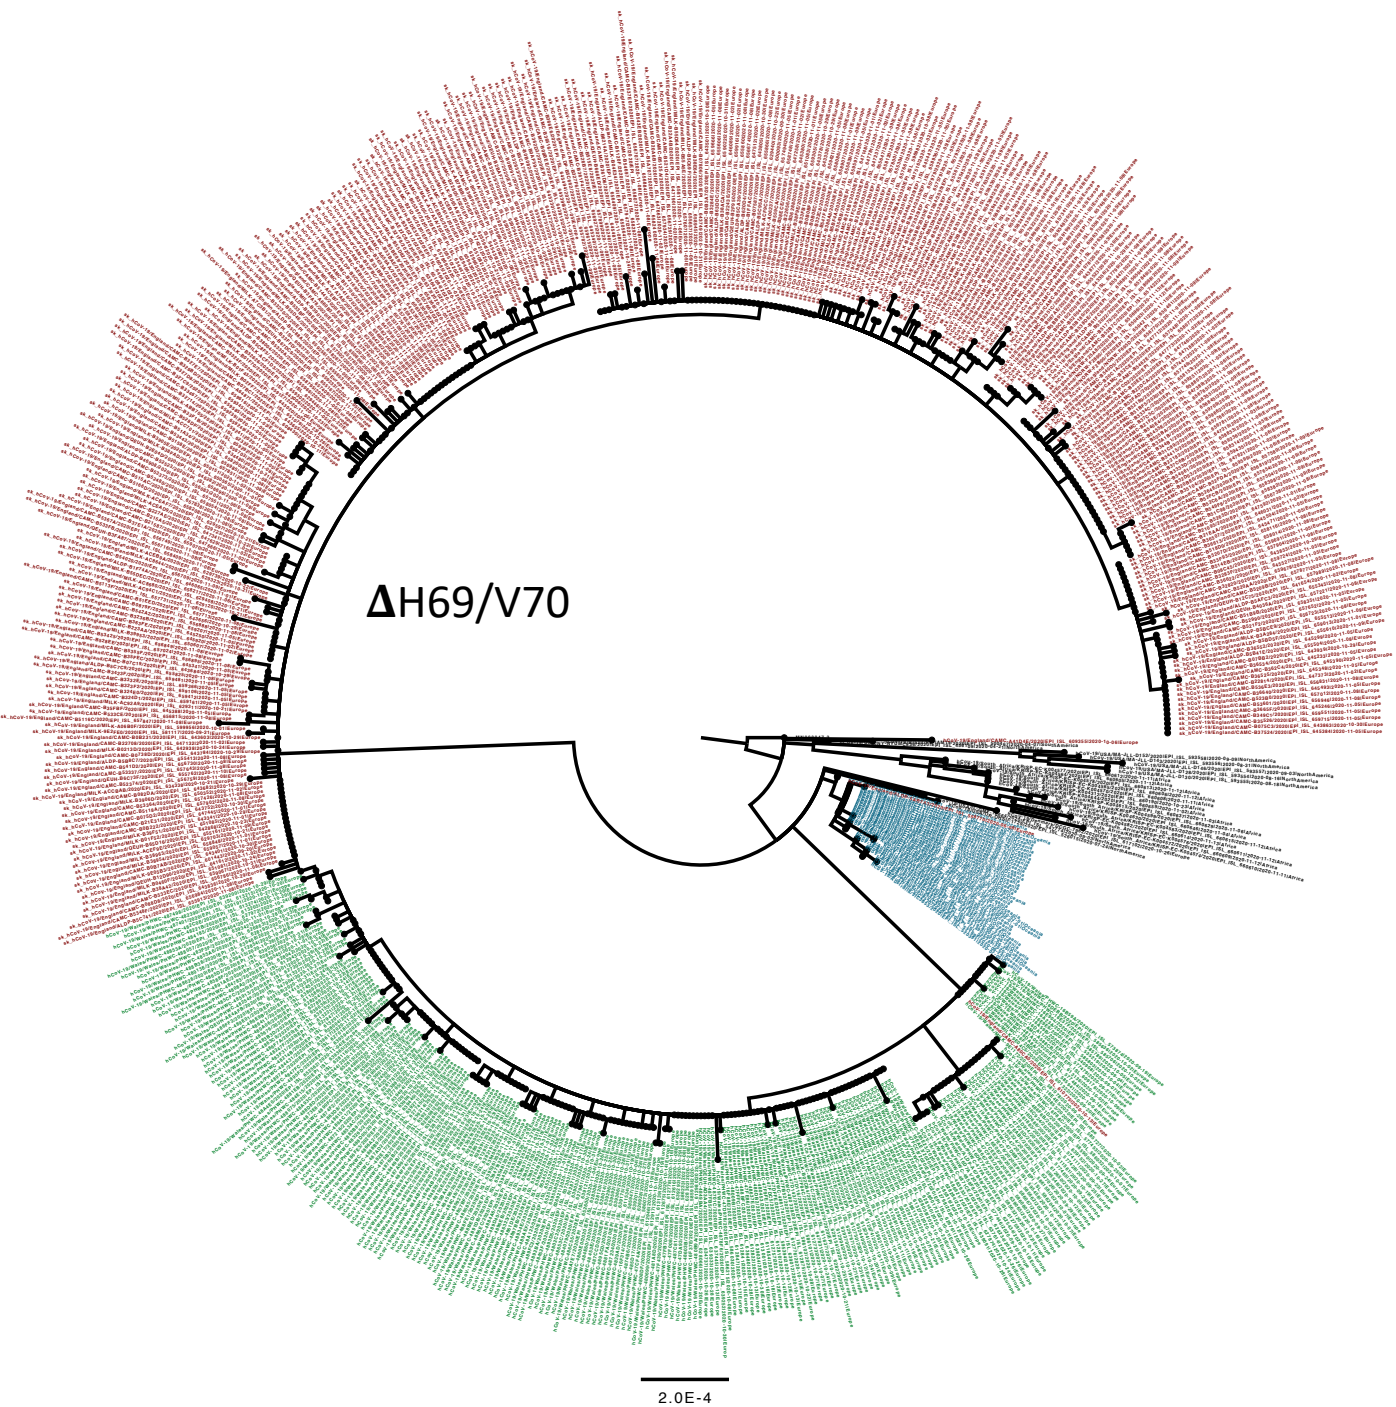

**Supplementary Figure 2. Circularised maximum likelihood phylogeny of global sequences carrying Spike mutant 501Y.** All sequences in the GISAID database containing S:501Y were downloaded and realigned to Wuhan-Hu-1 using MAFFT. Sequences were broadly split into four major clades; sequences carrying the Spike double deletion  $\Delta H69/V70$  (red) formed an entirely separate clade from non-carriers. Sequences carrying 501Y but an absence of  $\Delta H69/V70$  formed a second lineage and appeared to expand only in Wales (green). Another major clade (blue) was limited entirely to Australia and finally a fourth clade (black) was limited to several African countries and Brazil.
